# Supplementary material
Source: HighWire-hosted journal article supplement (https://ijgc.bmj.com/content/ijgc-2022-003434)
Supplement: inline-supplementary-material-1 [file inline-supplementary-material-1.pdf]

**Supplementary table 2. A summary of tips for carrying out the procedure**

| No. | Tips                                                                                                                                                                                                                                                                                                                                                                                                                                                                                                                                                                                                                                                                                                                                                                                                         |
|-----|--------------------------------------------------------------------------------------------------------------------------------------------------------------------------------------------------------------------------------------------------------------------------------------------------------------------------------------------------------------------------------------------------------------------------------------------------------------------------------------------------------------------------------------------------------------------------------------------------------------------------------------------------------------------------------------------------------------------------------------------------------------------------------------------------------------|
| 1   | To expose and mobilize the key structures (such as the ureter, the obturator nerve, and so on) surrounding the lesions to avoid incidental injuries                                                                                                                                                                                                                                                                                                                                                                                                                                                                                                                                                                                                                                                          |
| 2   | <p><b>To resect the mass in a logical way:</b></p> <p><b>First</b>, dividing the right ureter and mobilizing the internal iliac artery and obturator nerve to free the right lateral side of the mass.</p> <p><b>Second</b>, cutting the side wall peritoneum and opening the rectovaginal space to free the left lateral side of the mass.</p> <p><b>Third</b>, separating the posterior vesical wall from the vaginal stump and the mass, and dividing the right ureter stump to free the caudal end of the mass.</p> <p><b>Fourth</b>, dividing the right internal iliac artery to free the superior end of the mass.</p> <p><b>Fifth</b>, resecting the mass along its lower edge and removing it from the vagina.</p> <p><b>Sixth</b>, performing accurate hemostasis and closing the vaginal cuff.</p> |
